# Supplementary material for: High throughput sequencing of small RNAs transcriptomes in two Crassostrea oysters identifies microRNAs involved in osmotic stress response
Source: PubMed Central journal article supplement (PMC4778033; doi:10.1038/srep22687), 2016-03-04
Supplement: srep22687-s1.pdf [file srep22687-s1.pdf]

High throughput sequencing of small RNAs transcriptomes in two *Crassostrea* oysters identifies microRNAs involved in osmotic stress response

Xuelin Zhao<sup>1</sup>, Hong Yu<sup>1</sup>, Lingfeng Kong<sup>1</sup>, Shikai Liu<sup>1,2</sup>, Qi Li<sup>1\*</sup>

<sup>1</sup>*Key Laboratory of Mariculture, Ministry of Education, Ocean University of China, Qingdao 266003, China*

<sup>2</sup>*The Fish Molecular Genetics and Biotechnology Laboratory, School of Fisheries, Aquaculture, and Aquatic Sciences and Program of Cell and Molecular Biosciences, Auburn University, Auburn, AL 36849, USA*

\*Corresponding author: Q. Li, Fax: +86-532-82031765; E-mail address: qili66@ouc.edu.cn

Xuelin Zhao ([xlzhao1989@163.com](mailto:xlzhao1989@163.com))

Hong Yu ([hongyu@ouc.edu.cn](mailto:hongyu@ouc.edu.cn))

Lingfeng Kong ([klfaly@ouc.edu.cn](mailto:klfaly@ouc.edu.cn))

Shikai Liu ([szl0021@auburn.edu](mailto:szl0021@auburn.edu))

Qi Li ([qili66@ouc.edu.cn](mailto:qili66@ouc.edu.cn))

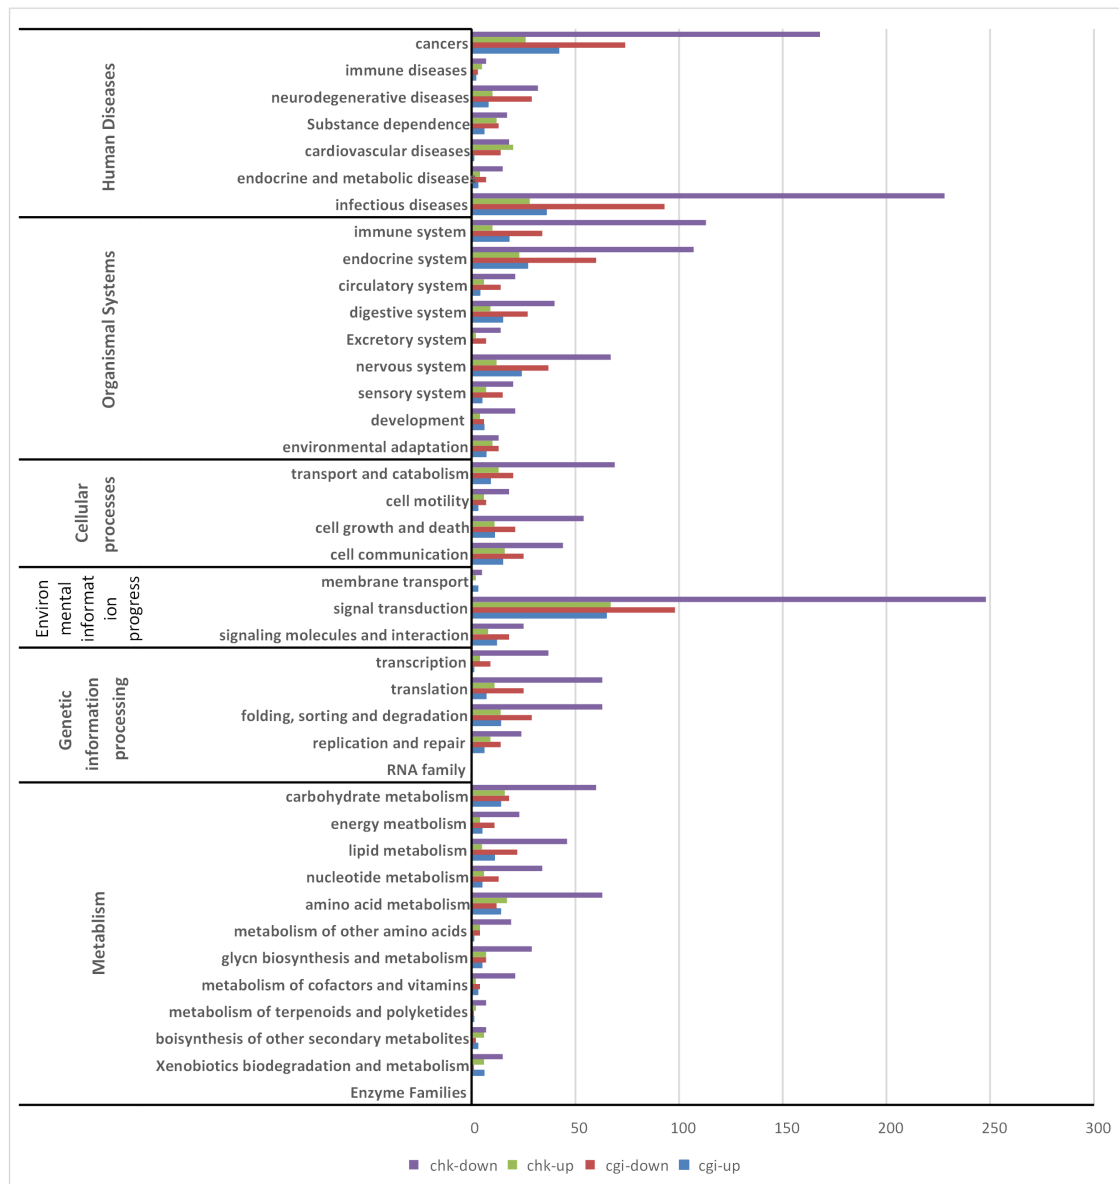

**Figure S1.** KEGG pathway distribution of target genes of differentially expressed miRNA of *C. gigas* and *C. hongkongensis*. Purple: target genes of down-regulated miRNAs in *C. hongkongensis*; Green: target genes of up-regulated miRNAs in *C. hongkongensis*; Red: target genes of down-regulated miRNAs in *C. gigas*; Blue: target genes of up-regulated miRNAs in *C. gigas*.
